# Supplementary material for: The Utilization of Linear Polylysine Coupled with Mechanic Forces to Extract Microbial DNA from Different Matrices
Source: PubMed Central journal article supplement (PMC7760326; doi:10.3390/microorganisms8121901), 2020-11-30
Supplement: microorganisms-08-01901-s001.pdf [file microorganisms-08-01901-s001.pdf]

## Supplementary Materials

# Utilization of linear polylysine coupled with mechanic forces to extract microbial DNA from different matrix

Celia François<sup>1</sup>, Celia Martinez<sup>1</sup>, Clement Faye<sup>1</sup>, Nathalie Pansu<sup>2,3</sup>, Catherine Dunyach-Remy<sup>2,3</sup>, Laurent Garrelly<sup>1</sup>, Benoit Roig<sup>4</sup> and Axelle Cadere<sup>4,\*</sup>

**Supplementary Table S1. Dilution factor required to remove inhibition with the standard protocol**

| Sample | Dilution factors applied for PCR analysis to remove inhibition with the standard protocol |
|--------|-------------------------------------------------------------------------------------------|
| 1      | 5                                                                                         |
| 2      | 10                                                                                        |
| 3      | 10                                                                                        |
| 4      | 10                                                                                        |
| 5      | 10                                                                                        |
| 6      | 5                                                                                         |
| 7      | 50                                                                                        |
| 8      | 10                                                                                        |
| 9      | 10                                                                                        |
| 10     | 50                                                                                        |
| 11     | 10                                                                                        |
| 12     | 50                                                                                        |
| 13     | 5                                                                                         |
| 14     | 10                                                                                        |
| 15     | 10                                                                                        |
| 16     | 10                                                                                        |
| 17     | 50                                                                                        |
| 18     | 10                                                                                        |
| 19     | 5                                                                                         |
| 20     | 10                                                                                        |
| 21     | 5                                                                                         |
| 22     | 10                                                                                        |
| 23     | 5                                                                                         |
| 24     | 5                                                                                         |
